# Supplementary material
Source: MDPI journal article supplement (https://www.mdpi.com/2673-4591/53/1/46)
Supplement: s1 [file s1]

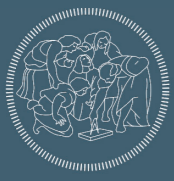

# Efficacy of FRP hooping in masonry domes

## A simple numerical approach

IOCBD  
2023

POLITECNICO  
MILANO 1863

Alessandro Gandolfi<sup>1\*</sup>, Natalia Pingaro<sup>1</sup>, Gabriele Milani<sup>1</sup>

<sup>1</sup> Department of Architecture, Urban Planning and Construction Engineering, Politecnico di Milano, Italy

\*correspondence: alessandro.gandolfi@polimi.it

### MASONRY DOMES

#### STATEMENT OF THE ISSUE

- NOT ONLY NO-TENSION MATERIAL
- NO DOME = ARCH SIMPLIFICATIONS
- SIMPLE FRP BY FEM APPROACH

Clay Bricks: linear elastic  
**MORTAR JOINTS: nonlinear**

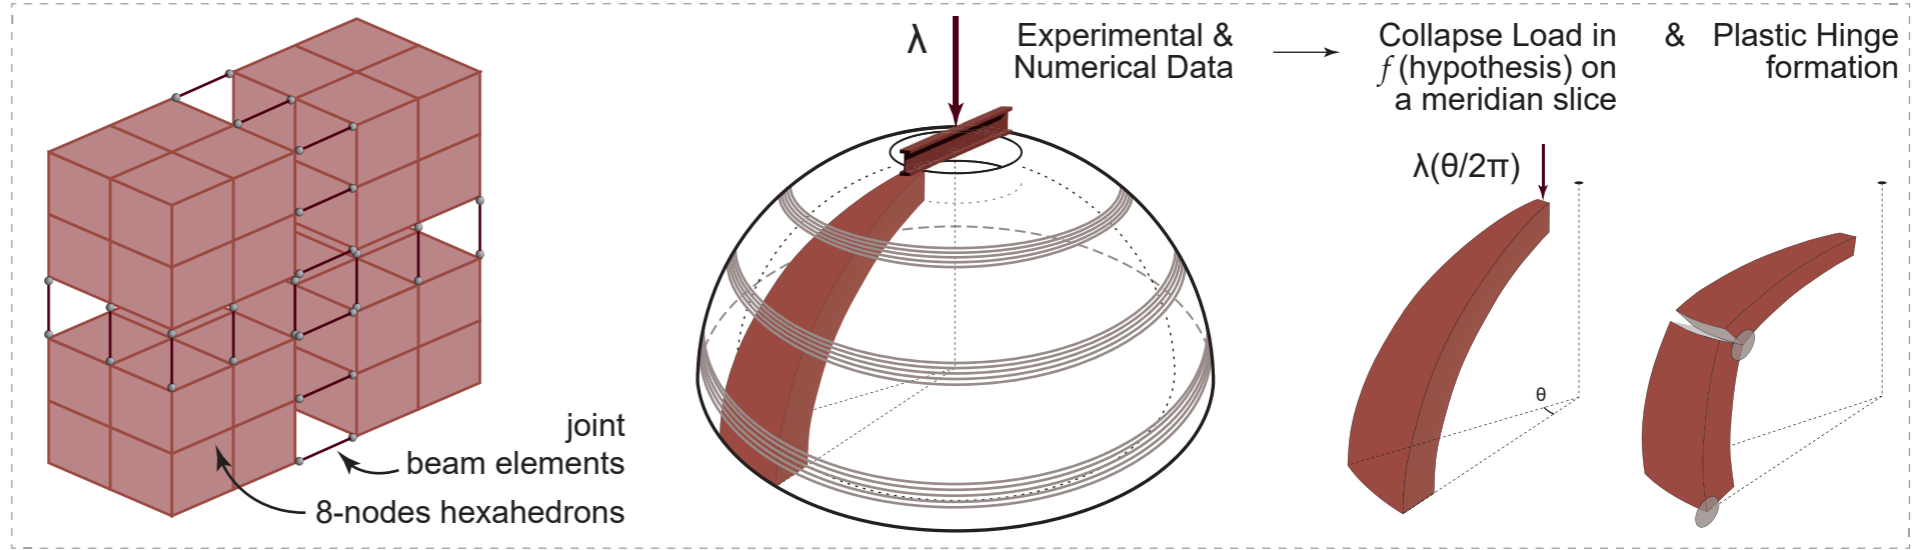

by Hypothesis:

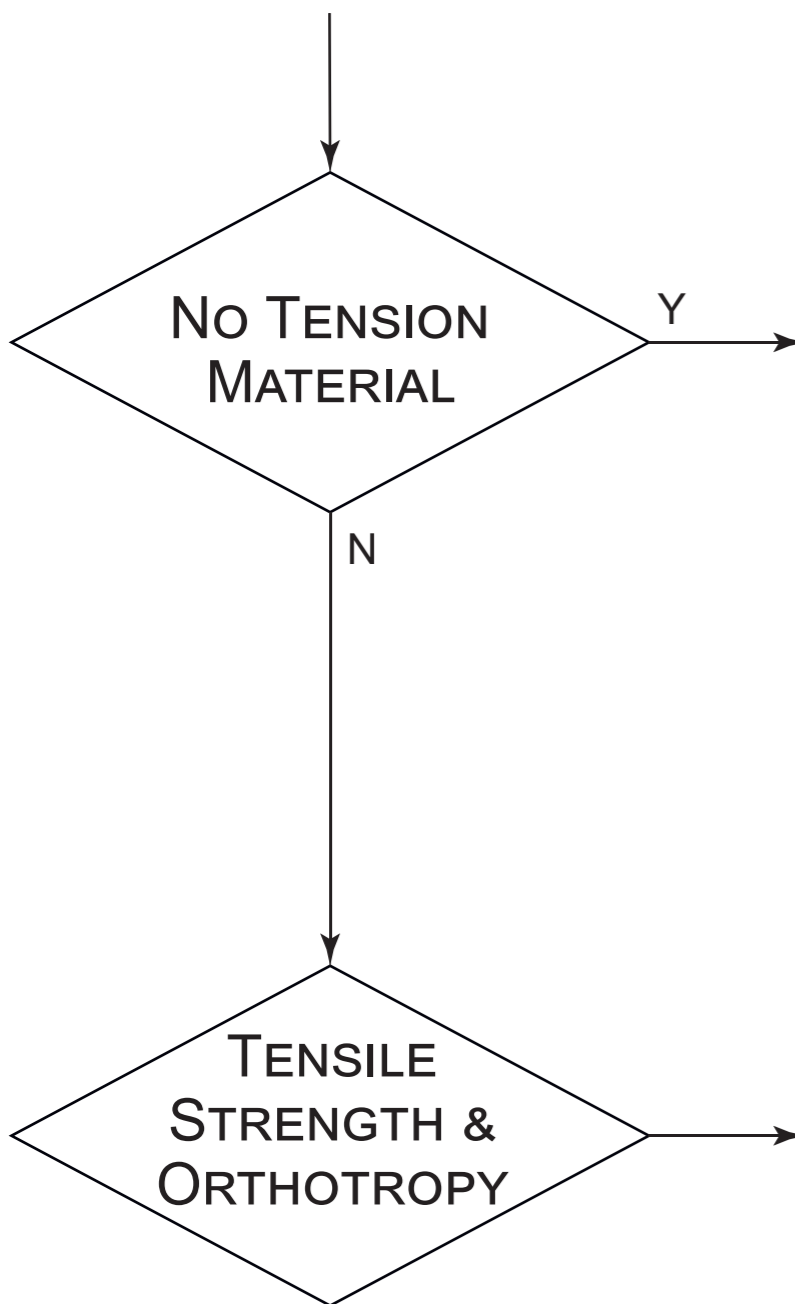

### POINT CONTACTS

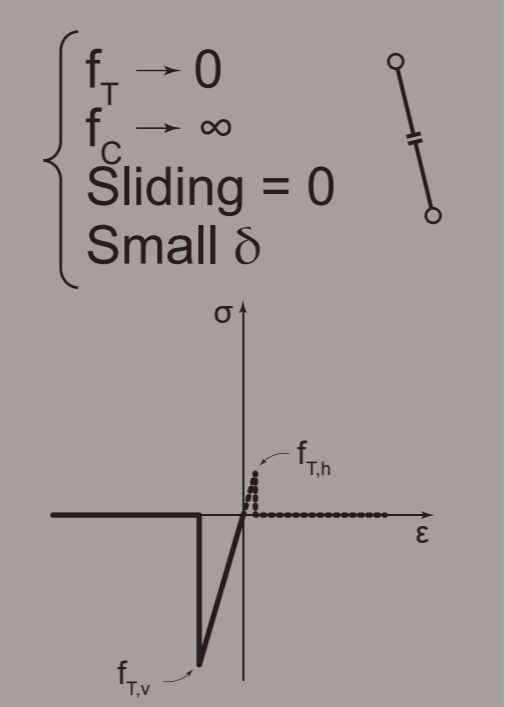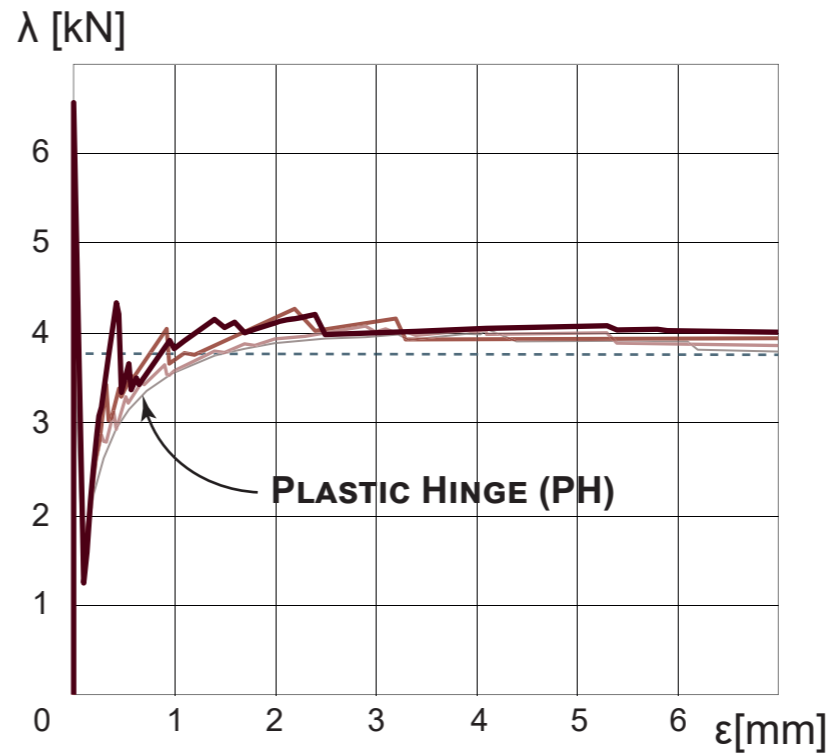

- LB Lim. Analysis [1]
- $f_{T,h} = 0.00$  MPa (NTM)
- $f_{T,h} = 0.05$  MPa
- $f_{T,h} = 0.07$  MPa
- $f_{T,h} = 0.10$  MPa

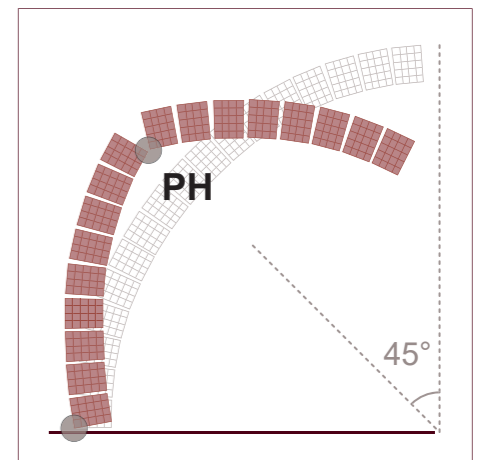

### CUTOFF BARS

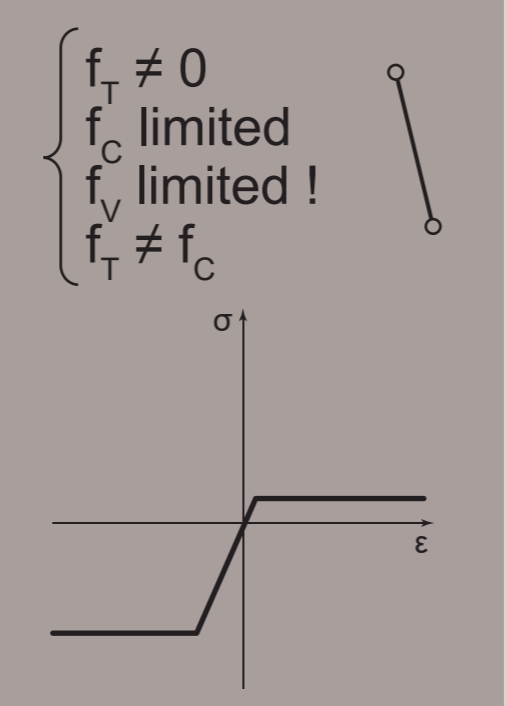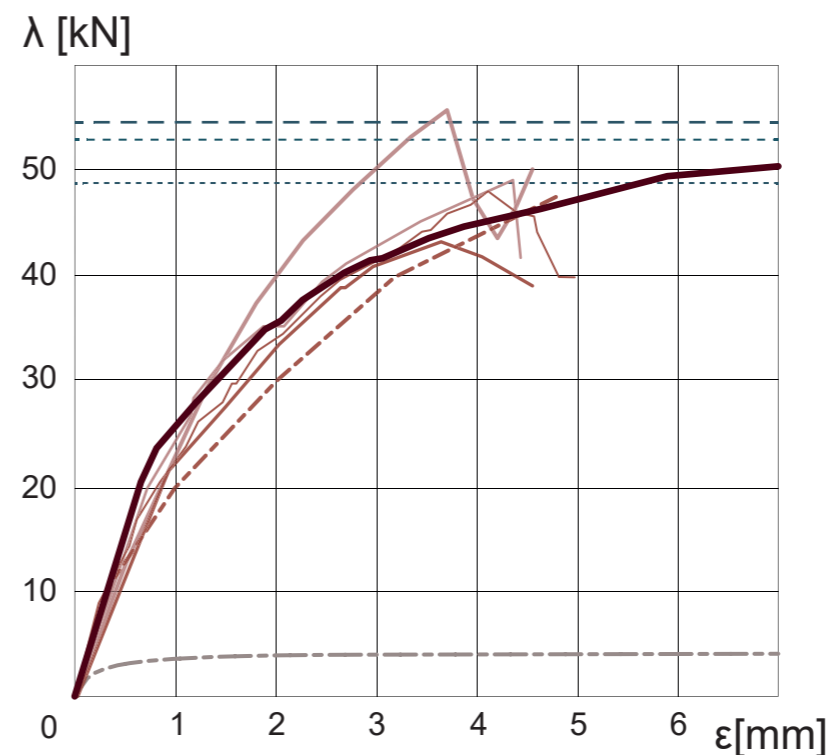

- UB Lim. Analysis [2]
- Nurbs UB LA [3]
- LB Lim. Analysis [4]
- DIANA FEM homogen. [2]
- DIANA FEM heterogen. [2]
- DSM model [5]
- QP model [5]
- Experimental Data [6,7]
- EPP CoB FEM
- NTM hypothesis

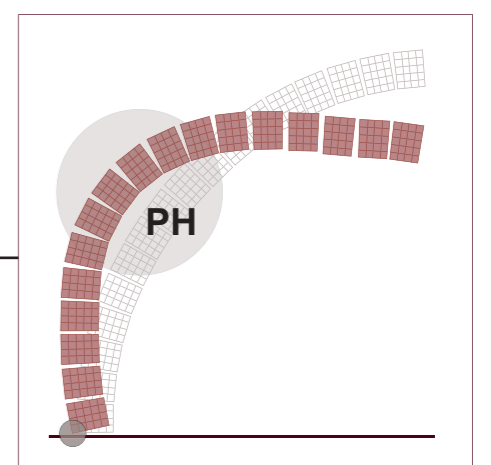

### CUTOFF BARS

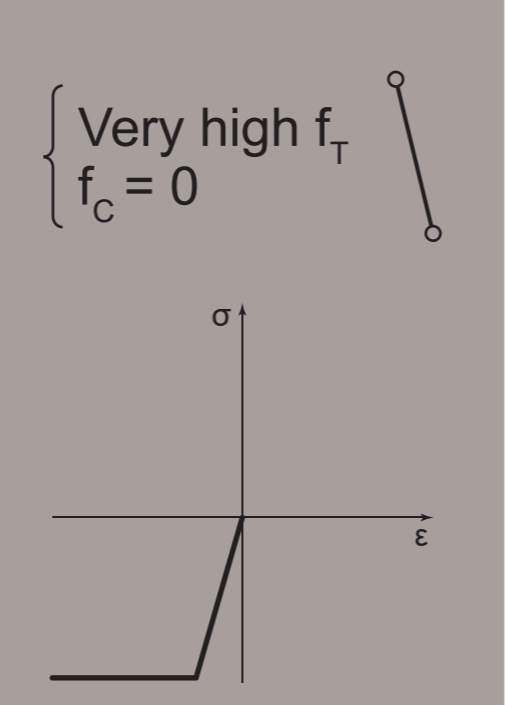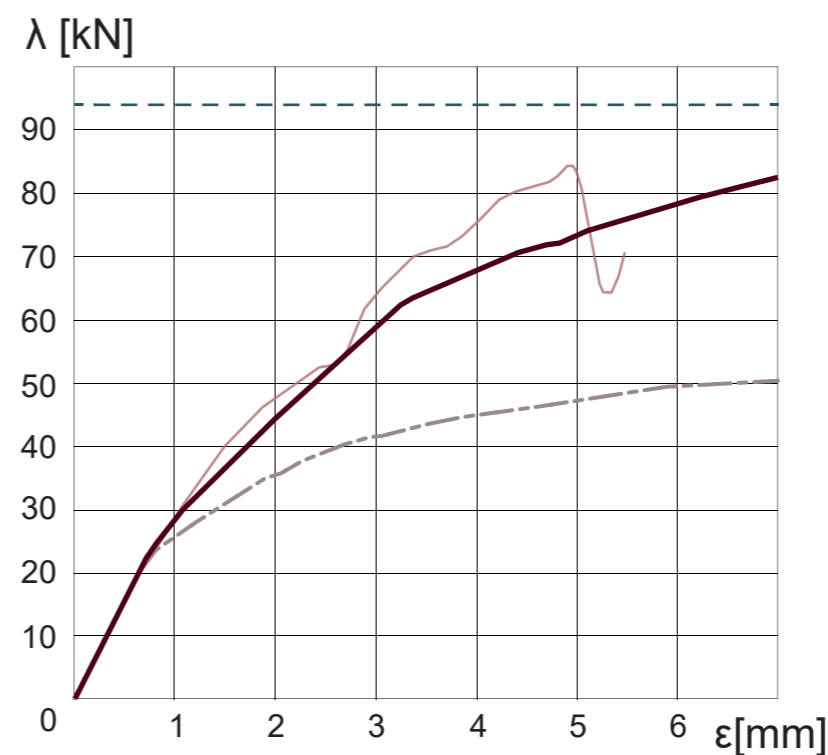

- UB Lim. Analysis FRP [2]
- DIANA FEM FRP [2]
- EPP CoB FEM
- EPP CoB FRP

#### CONCLUSIONS:

NTM MODEL → { 45° PH  
CONSERV. λ

$f_T$  + ORTHOTROPY → { SMEARED PH  
ACCURATE λ

FRP MODEL BY CoB → 2λ INCREASE

#### REFERENCES:

1. D. Aita, G. Milani, and A. Taliervo, "Limit analysis of masonry double curvature structures: a comparison between different approaches," Mathematics and Mechanics of Solids. In Printing.
2. G. Milani, E. Milani, and A. Tralli, "Upper bound limit analysis model for FRP-reinforced masonry curved structures. Part II: Structural analyses," Comput Struct, vol. 87, no. 23–24, pp. 1534–1558, 2009.
3. A. Chiozzi, G. Milani, and A. Tralli, "A Genetic Algorithm NURBS-based new approach for fast kinematic limit analysis of masonry vaults," Comput Struct, vol. 182, pp. 187–204, 2017.
4. G. Milani, "Simple lower bound limit analysis model for masonry double curvature structures," Comput Struct, vol. 269, p. 106831, 2022.
5. Milani, G., & Tralli, A. (2012). A simple meso-macro model based on SQP for the non-linear analysis of masonry double curvature structures. IJSS, 49(5), 808–834.
6. P. Foraboschi, "Strengthening of Masonry Arches with Fiber-Reinforced Polymer Strips," Journal of Composites for Construction, vol. 8, no. 3, pp. 191–202, 2004.
7. G. Creazza, A. V. Saetta, R. Matteazzi, and R. V. Vitaliani, "Analyses of masonry vaulted structures by using 3-D damage model," ECCOMAS 2000, no. September, pp. 11–14, 2000.
